# Supplementary material
Source: publisher site journal article supplement (https://www.spandidos-publications.com/4755/downloadSupplementary)
Supplement: Supplementary file 1 [file downloadSupplementary]

Table SII. Fold changes and statistical significances (P-values in brackets) of investigated comparisons with the Wilcoxon signed-rank test.

| Comparison                                  | <i>LITD1</i>   | <i>SLITRK6</i> | <i>ST6GALNAC1</i>            | <i>TCEA3</i>                 |
|---------------------------------------------|----------------|----------------|------------------------------|------------------------------|
| Central part vs.<br>Invasive front          | -2.34          | 1.12           | -2.64 (P=0.041) <sup>a</sup> | -1.22 (P=0.035) <sup>a</sup> |
| Central part<br>vs.lymph node<br>metastasis | -52.95 (0.002) | -13.45 (0.001) | -12.82 (P<0.001)             | -2.68 (P=0.003)              |
| Central part<br>vs.liver metastasis         | -28.12         | 4.37           | -2.18                        | 1.06                         |

<sup>a</sup>Comparison falls above the corrected borderline significance P=0.017 after additional Bonferroni correction for the investigated comparisons.  $\Delta Cq$  data obtained by normalization to the geometric mean of *B2M* and *IPO8* reference genes,  $\Delta\Delta Cq$  data obtained by normalization to central part of primary tumor. Fold changes calculated as  $2^{-\Delta\Delta Cq}$ .

Table SIII. Fold changes and statistical significances (P-values in brackets) of investigated comparisons with the Wilcoxon signed-rank test for the investigated miRNAs.

| Comparison                                  | miR-199a-3p               | miR-425-5p       | miR-1225-3p   | miR-1233-3p         | miR-1303     |
|---------------------------------------------|---------------------------|------------------|---------------|---------------------|--------------|
| Central part<br>vs.invasive front           | 1.73 (0.040) <sup>a</sup> | -1.88            | -1.24         | 1.09                | 1.95         |
| Central part<br>vs.lymph node<br>metastasis | 46.00 (P <0.001)          | 26.01 (P <0.001) | 17.15 (0.004) | 16.84 (P<br><0.001) | 5.83 (0.007) |
| Central part<br>vs.liver metastasis         | 75.43 (0.002)             | 1520.56 (0.004)  | 1.63          | -3.16 (0.006)       | -1.60        |

<sup>a</sup>Comparison falls above the corrected borderline significance P=0.017 after additional Bonferroni correction for the investigated comparisons. miRNA/miR, microRNA.  $\Delta$ Cq data obtained by normalization to the geometric mean of RNU6B and miR-1274b reference genes,  $\Delta\Delta$ Cq data obtained by normalization to central part of primary tumor. Fold changes calculated as  $2^{-\Delta\Delta Cq}$ .
